# Supplementary material for: Transcriptomics Associates Molecular Features with 18F-Fluorocholine PET/CT Imaging Phenotype and Its Potential Relationship to Survival in Hepatocellular Carcinoma
Source: Oxford University Press journal article supplement (doi:10.1158/0008-5472.can-18-3837), 2019-02-13
Supplement: 00085472can183837-sup-213333_2_supp_5316053_pm83j0.docx [file 00085472can183837-sup-213333_2_supp_5316053_pm83j0.docx]

Supplementary Tables S3-S8 summarize computed gene overlaps between gene sets associated with high tumor FCh uptake and gene sets from the Broad Institute Molecular Signature Database Hallmarks collection and Chemical and Genetic Perturbations (CGP) v6.2 collection. Overlaps were computed using the “Investigate gene sets” tool provided by the MSigDB web-site (software.broadinstitute.org).

Supplementary Table S3: Significant gene overlaps between HOSHIDA_LIVER_CANCER_SUBCLASS_S3 (comprised of 265 genes) and Hallmark gene sets.

| Gene Set Name | # Genes in Gene Set (K) | # Genes in Overlap (k) | k/K | FDR q-value |
| --- | --- | --- | --- | --- |
| HALLMARK_XENOBIOTIC_METABOLISM | 200 | 46 | 0.23 | 2.20E-58 |
| HALLMARK_FATTY_ACID_METABOLISM | 158 | 26 | 0.1646 | 1.01E-28 |
| HALLMARK_COAGULATION | 138 | 22 | 0.1594 | 4.11E-24 |
| HALLMARK_OXIDATIVE_PHOSPHORYLATION | 200 | 23 | 0.115 | 5.77E-22 |
| HALLMARK_ADIPOGENESIS | 200 | 21 | 0.105 | 2.55E-19 |
| HALLMARK_PEROXISOME | 104 | 13 | 0.125 | 3.89E-13 |
| HALLMARK_UV_RESPONSE_UP | 158 | 14 | 0.0886 | 4.38E-12 |
| HALLMARK_COMPLEMENT | 200 | 15 | 0.075 | 5.78E-12 |
| HALLMARK_ESTROGEN_RESPONSE_LATE | 200 | 15 | 0.075 | 5.78E-12 |
| HALLMARK_BILE_ACID_METABOLISM | 112 | 12 | 0.1071 | 1.46E-11 |

Supplementary Table S4: Significant gene overlaps between HOSHIDA_LIVER_CANCER_SUBCLASS_S3 (comprised of 265 genes) and Chemical and CGP collection gene sets.

| Gene Set Name | # Genes in Gene Set (K) | # Genes in Overlap (k) | k/K | FDR q-value |
| --- | --- | --- | --- | --- |
| HSIAO_LIVER_SPECIFIC_GENES | 244 | 102 | 0.418 | 6.78E-165 |
| FLECHNER_BIOPSY_KIDNEY_TRANSPLANT_REJECTED_VS_OK_DN | 546 | 69 | 0.1264 | 1.94E-68 |
| CAIRO_HEPATOBLASTOMA_DN | 267 | 55 | 0.206 | 4.13E-66 |
| CHIANG_LIVER_CANCER_SUBCLASS_PROLIFERATION_DN | 179 | 47 | 0.2626 | 1.34E-61 |
| LEE_LIVER_CANCER_SURVIVAL_UP | 185 | 45 | 0.2432 | 3.07E-57 |
| CAIRO_LIVER_DEVELOPMENT_DN | 222 | 42 | 0.1892 | 2.92E-48 |
| WOO_LIVER_CANCER_RECURRENCE_DN | 80 | 31 | 0.3875 | 3.43E-46 |
| MOOTHA_MITOCHONDRIA | 447 | 48 | 0.1074 | 2.54E-43 |

Supplementary Table S5: Significant gene overlaps between LEE_LIVER_CANCER_SURVIVAL_UP (comprised of 185 genes) and Hallmark gene sets

| Gene Set Name | # Genes in Gene Set (K) | # Genes in Overlap (k) | k/K | FDR q-value |
| --- | --- | --- | --- | --- |
| HALLMARK_XENOBIOTIC_METABOLISM | 200 | 23 | 0.115 | 4.70E-25 |
| HALLMARK_COAGULATION | 138 | 13 | 0.0942 | 4.53E-13 |
| HALLMARK_BILE_ACID_METABOLISM | 112 | 12 | 0.1071 | 6.55E-13 |
| HALLMARK_FATTY_ACID_METABOLISM | 158 | 9 | 0.057 | 2.29E-07 |
| HALLMARK_REACTIVE_OXIGEN_SPECIES_PATHWAY | 49 | 4 | 0.0816 | 4.67E-04 |
| HALLMARK_COMPLEMENT | 200 | 6 | 0.03 | 1.41E-03 |
| HALLMARK_UV_RESPONSE_UP | 158 | 5 | 0.0316 | 3.35E-03 |
| HALLMARK_PEROXISOME | 104 | 4 | 0.0385 | 5.19E-03 |
| HALLMARK_ADIPOGENESIS | 200 | 5 | 0.025 | 5.19E-03 |
| HALLMARK_ESTROGEN_RESPONSE_EARLY | 200 | 5 | 0.025 | 5.19E-03 |

Supplementary Table S6: Significant gene overlaps between LEE_LIVER_CANCER_SURVIVAL_UP (comprised of 185 genes) and Chemical and CGP collection gene sets

| Gene Set Name | # Genes in Gene Set (K) | # Genes in Overlap (k) | k/K | FDR q-value |
| --- | --- | --- | --- | --- |
| CHIANG_LIVER_CANCER_SUBCLASS_PROLIFERATION_DN | 179 | 54 | 0.3017 | 2.67E-84 |
| HSIAO_LIVER_SPECIFIC_GENES | 244 | 46 | 0.1885 | 1.22E-60 |
| HOSHIDA_LIVER_CANCER_SUBCLASS_S3 | 266 | 45 | 0.1692 | 4.60E-57 |
| KIM_LIVER_CANCER_POOR_SURVIVAL_DN | 43 | 21 | 0.4884 | 1.04E-36 |
| WOO_LIVER_CANCER_RECURRENCE_DN | 80 | 23 | 0.2875 | 6.34E-34 |
| ANDERSEN_LIVER_CANCER_KRT19_DN | 75 | 22 | 0.2933 | 1.17E-32 |
| CAIRO_LIVER_DEVELOPMENT_DN | 222 | 26 | 0.1171 | 1.03E-27 |
| CHIANG_LIVER_CANCER_SUBCLASS_CTNNB1_UP | 176 | 23 | 0.1307 | 1.70E-25 |

Supplementary Table S7: Significant gene overlaps between KIM_LIVER_CANCER_POOR_SURVIVAL_DN (comprised of 43 genes) and Hallmark gene sets

| Gene Set Name | # Genes in Gene Set (K) | # Genes in Overlap (k) | k/K | FDR q-value |
| --- | --- | --- | --- | --- |
| HALLMARK_XENOBIOTIC_METABOLISM | 200 | 9 | 0.045 | 1.16E-11 |
| HALLMARK_COAGULATION | 138 | 7 | 0.0507 | 1.39E-09 |
| HALLMARK_COMPLEMENT | 200 | 6 | 0.03 | 5.60E-07 |
| HALLMARK_BILE_ACID_METABOLISM | 112 | 4 | 0.0357 | 4.79E-05 |
| HALLMARK_PEROXISOME | 104 | 3 | 0.0288 | 1.30E-03 |
| HALLMARK_FATTY_ACID_METABOLISM | 158 | 3 | 0.019 | 3.71E-03 |
| HALLMARK_PANCREAS_BETA_CELLS | 40 | 2 | 0.05 | 4.66E-03 |
| HALLMARK_ADIPOGENESIS | 200 | 3 | 0.015 | 5.51E-03 |

Supplementary Table S8: Significant gene overlaps between KIM_LIVER_CANCER_POOR_SURVIVAL_DN (comprised of 43 genes) and Chemical and CGP collection gene sets

| Gene Set Name | # Genes in Gene Set (K) | # Genes in Overlap (k) | k/K | FDR q-value |
| --- | --- | --- | --- | --- |
| LEE_LIVER_CANCER_SURVIVAL_UP | 185 | 21 | 0.1135 | 2.60E-36 |
| WOO_LIVER_CANCER_RECURRENCE_DN | 80 | 17 | 0.2125 | 9.28E-34 |
| HSIAO_LIVER_SPECIFIC_GENES | 244 | 18 | 0.0738 | 2.76E-27 |
| HOSHIDA_LIVER_CANCER_SUBCLASS_S3 | 266 | 17 | 0.0639 | 1.38E-24 |
| CHIANG_LIVER_CANCER_SUBCLASS_PROLIFERATION_DN | 179 | 13 | 0.0726 | 5.76E-19 |
| FLECHNER_BIOPSY_KIDNEY_TRANSPLANT_REJECTED_VS_OK_DN | 546 | 12 | 0.022 | 3.78E-11 |
| CAIRO_LIVER_DEVELOPMENT_DN | 222 | 9 | 0.0405 | 2.55E-10 |
| GRUETZMANN_PANCREATIC_CANCER_DN | 203 | 7 | 0.0345 | 3.02E-07 |
